# Supplementary material for: Preliminary study on the treatment of acute angle-closure glaucoma with high-intensity focused ultrasound cycloplasty
Source: Research Square preprint supplement (doi:10.21203/rs.3.rs-5675275/v1), 2025-01-01
Supplement: Supplementary file 1 [file aae7c639a6b96f7062f209f2.xlsx]

## Sheet: Sheet1
Preoperative	性别	年龄	眼别	术前眼压	LogMAR	降眼压用药种类	探头	扇区	白到白	角膜内皮	角膜厚度	眼轴	前房深度	悬韧带长度	上	下	鼻	颞	睫状肌厚度	上	下	鼻	颞	小梁网-睫状突夹角	上	下	鼻	颞
1	男	67	OD	55	1.6	4	12	10	11	3237	681	22.37	1.41		0.65	0.61	0.65	0.62		0.61	0.66	0.63	0.66		62.3	66.7	51.2	55.2
2	女	80	OD	52	2.8	3	12	10	11.2	0	621	22.35	1.04		1.23	0.41	1.2	0.43		0.48	0.53	0.44	0.37		80.6	69.2	85.7	72.1
3	男	64	OD	46	1.6	4	12	8	11.3	0	1190	22.35	0.9		0.56	0.64	0.62	0.52		0.57	0.61	0.66	0.72		32.3	44	39.8	37.1
4	女	71	OD	58	2.9	4	12	10	11.6	0	649	22.92	1.7		0.27	0.37	0.22	0.69		0.57	0.66	0.62	0.62		46.9	53.4	77.6	66.5
5	女	83	OS	55	1.4	3	12	10	11.5	892	590	22.46	1.76		0.61	0.63	0.51	0.63		0.63	0.75	0.61	0.56		34.5	30.5	34.7	46.5
6	女	66	OD	45	2	4	12	10	11.1	0	569	21.99	1.64		0.69	0.67	0.63	0.6		0.63	0.68	0.63	0.68		73.4	44.1	26.6	32.9
7	女	76	OD	50	2.6	4	12	10	11.2	2526	653	21.88	1.73		0.41	0.4	0.43	0.41		0.66	0.72	0.68	0.75		66.6	38.4	61.8	51
8	男	55	OD	56	2.8	4	12	10	11.1	0	633	21.76	1.38		0.63	0.61	0.66	0.64		0.54	0.57	0.61	0.55		63.5	68.4	53.7	60.1
9	女	62	OD	53	2.7	4	12	10	10.9	0	635	21.82	1.21		0.71	0.72	0.71	0.69		0.64	0.68	0.62	0.64		74.6	68.4	75.3	69.7
10	女	57	OS	49	2.7	4	11	10	10.6	0	629	21.42	1.44		0.44	0.43	0.43	0.46		0.58	0.61	0.66	0.63		52.4	61.5	57.3	53.9
11	女	63	OS	52	1.6	4	12	10	11.8	1054	655	22.77	1.33		0.39	0.4	0.43	0.36		0.62	0.64	0.68	0.61		54.7	62.3	68	66.4
12	男	71	OS	58	2.8	4	12	10	11.4	0	658	22.63	1.26		0.59	0.54	0.57	0.55		0.51	0.58	0.6	0.55		43.2	47.5	47.1	43.9
13	女	57	OD	51	1.8	4	12	10	10.9	703	661	21.64	1.36		0.62	0.6	0.59	0.63		0.57	0.69	0.64	0.63		53.2	49.6	38.4	45.3
14	女	54	OD	52	1.34	4	12	10	10.8	982	672	21.53	1.52		0.71	0.74	0.68	0.64		0.59	0.58	0.61	0.62		64.3	40.2	61.8	54.8
15	男	60	OD	47	1.4	4	12	10	11.6	1024	598	22.56	1.54		0.64	0.67	0.61	0.68		0.62	0.64	0.59	0.66		53.6	63.4	48.5	56.5
16	男	69	OD	58	2.7	4	12	10	11.5	0	647	22.37	1.35		0.52	0.58	0.53	0.55		0.64	0.73	0.68	0.64		43.3	54.9	39.8	46.5

## Sheet: Sheet2
POD1	眼压	LogMAR	降眼压用药种类	前房深度	悬韧带长度	上	下	鼻	颞	睫状肌厚度	上	下	鼻	颞	小梁网-睫状突夹角	上	下	鼻	颞
1	20	1.6	0	1.47		0.48	0.57	0.53	0.51		0.72	0.68	0.71	0.67		45.3	54.7	51.1	66.6
2	18	2.8	0	1.52		0.52	0.19	0.54	0.33		0.55	0.57	0.69	0.33		87	75.4	68.7	72.8
3	10	1.25	0	1.67		0.47	0.23	0.54	0.57		0.71	0.64	0.68	0.93		53.4	72.8	60	43.7
4	15	2.9	0	2.22		0.25	0.42	0.33	0.17		0.7	0.74	0.71	0.82		52.4	40.2	46.2	29.7
5	10.1	1.3	0	1.8		0.35	0.35	0.42	0.32		0.64	0.63	0.76	0.79		65.1	39.1	43.5	36.8
6	9	2.7	0	1.8		0.41	0.46	0.34	0.47		0.67	0.92	0.71	0.74		36.7	52.2	35.7	39.9
7	6	2	0	1.82		0.38	0.32	0.24	0.36		0.82	1.11	0.7	0.25		64.9	79.6	66.3	68.4
8	11	2.7	0	1.53		0.46	0.44	0.38	0.57		0.57	0.64	0.67	0.52		68.4	67.9	54.3	60.2
9	10	2	0	1.59		0.34	0.27	0.46	0.57		0.69	0.77	0.61	0.69		73.8	59.1	74.3	66.4
10	17	2.7	0	1.68		0.41	0.25	0.28	0.37		0.63	0.74	0.71	0.68		48.3	58.1	57.2	54
11	8	1.25	0	1.87		0.33	0.38	0.42	0.31		0.7	0.68	0.64	0.6		44.6	53.2	64.4	57.7
12	24	2.8	0	1.33		0.38	0.47	0.44	0.39		0.59	0.63	0.65	0.76		42.1	48.4	47	43.6
13	13	1.8	0	1.77		0.42	0.36	0.48	0.46		0.63	0.73	0.68	0.66		55.7	44.5	43	48.4
14	9	1	0	1.9		0.51	0.43	0.64	0.57		0.64	0.59	0.69	0.61		54.5	41.7	51.6	50.4
15	13	1.1	0	1.74		0.35	0.46	0.51	0.55		0.73	0.67	0.52	0.69		39.2	53.7	49.6	53.5
16	15	2.7	0	1.85		0.28	0.38	0.46	0.53		0.67	0.81	0.66	0.69		41.6	57.9	34.3	43.4

## Sheet: Sheet3
POW1	眼压	LogMAR	降眼压用药种类	前房深度	悬韧带长度	上	下	鼻	颞	睫状肌厚度	上	下	鼻	颞	小梁网-睫状突夹角	上	下	鼻	颞
1	15	1.6	0	1.71		0.25	0.39	0.42	0.36		0.65	0.81	0.57	0.58		63.1	41.8	51.5	54.1
2	7	2.8	0	1.3		0.53	0.17	0.57	0.29		0.53	0.54	0.65	0.31		90	76.3	72.1	74.4
3	10	1.2	0	1.42		0.44	0.21	0.53	0.54		0.69	0.63	0.66	0.87		53.1	72.4	60.2	43.4
4	12	2.9	0	1.64		0.27	0.18	0.46	0.57		0.7	0.76	0.66	0.78		51.5	53.4	86.8	43.4
5	12	0.9	0	1.71		0.33	0.32	0.41	0.3		0.6	0.62	0.72	0.71		63.6	38.7	43.4	36.9
6	9	2.7	0	1.79		0.4	0.41	0.37	0.35		0.7	0.89	0.81	0.72		44.1	67.1	41.7	38.4
7	7	1.6	0	1.71		0.32	0.28	0.26	0.32		1.01	0.95	0.82	0.9		51.6	61.1	45.5	61.6
8	10	2.7	0	1.52		0.44	0.41	0.36	0.52		0.56	0.6	0.67	0.51		68	67.7	53.7	60.1
9	10	1.6	0	1.51		0.33	0.23	0.44	0.52		0.63	0.75	0.6	0.64		73.1	59	74.5	66.7
10	12	2.7	0	1.65		0.36	0.22	0.21	0.34		0.61	0.7	0.68	0.67		47.5	57.3	57.1	54.1
11	7	1.1	0	1.53		0.33	0.32	0.41	0.27		0.66	0.66	0.61	0.58		42.8	51.3	61.5	53.6
12	12	2.8	0	1.46		0.35	0.41	0.4	0.35		0.52	0.61	0.64	0.77		40.6	44.1	45.4	40.8
13	9	1.8	0	1.72		0.41	0.33	0.44	0.41		0.61	0.7	0.64	0.63		55.3	44.2	43.1	46.3
14	8	0.82	0	1.77		0.48	0.33	0.56	0.49		0.61	0.54	0.65	0.55		54.1	41.6	51.2	50.1
15	11	0.88	0	1.69		0.32	0.41	0.52	0.51		0.68	0.61	0.52	0.64		39.3	53.4	49.2	53.6
16	13	2.7	0	1.64		0.27	0.31	0.42	0.5		0.61	0.77	0.62	0.63		41.7	57.5	32.6	43.2

## Sheet: Sheet4
POM1	眼压	LogMAR	降眼压用药种类	前房深度	悬韧带长度	上	下	鼻	颞	睫状肌厚度	上	下	鼻	颞	小梁网-睫状突夹角	上	下	鼻	颞
1	11	1.6	0	1.7		0.24	0.37	0.41	0.33		0.61	0.8	0.53	0.54		62.6	38.4	51.4	53.4
2	12	2.8	0	1.33		0.51	0.15	0.55	0.24		0.5	0.51	0.63	0.33		87.5	74.3	70.5	71.5
3	10	1.2	0	1.42		0.48	0.34	0.51	0.35		0.76	0.89	0.76	0.83		48.7	50.3	51.6	74.8
4	11	2.9	0	1.67		0.37	0.42	0.41	0.33		0.59	0.52	0.53	0.51		43.8	31	31.7	38.7
5	14	1	1	1.82		0.5	0.43	0.49	0.47		0.54	0.7	0.67	0.64		74.7	51.7	54.7	44.3
6	9	2.7	0	1.77		0.36	0.39	0.33	0.32		0.67	0.88	0.82	0.71		40.3	65.6	40.3	34.6
7	10	1.9	0	1.7		0.3	0.24	0.23	0.31		0.98	0.93	0.81	0.91		49.4	60.4	43.5	60.3
8	9	2.7	0	1.51		0.41	0.39	0.35	0.46		0.53	0.6	0.63	0.48		65.4	64.2	52.4	60.2
9	10	1.6	0	1.55		0.32	0.25	0.41	0.51		0.62	0.73	0.58	0.62		71.5	53.5	72.2	62.3
10	11	2.7	0	1.62		0.33	0.21	0.2	0.34		0.6	0.66	0.63	0.65		42.6	52.6	52.7	51.9
11	10	1.1	0	1.52		0.32	0.28	0.37	0.25		0.61	0.63	0.6	0.59		42.3	50.4	58.3	51.4
12	13	2.8	0	1.45		0.33	0.38	0.36	0.34		0.53	0.6	0.63	0.74		40.1	43.5	44.5	38.3
13	11	1.8	0	1.7		0.38	0.32	0.37	0.39		0.56	0.67	0.6	0.62		53.8	43.1	41.7	44.5
14	14	0.94	0	1.76		0.39	0.3	0.51	0.46		0.6	0.52	0.63	0.54		53.4	40.3	50.4	49.4
15	12	1	0	1.64		0.31	0.36	0.45	0.48		0.63	0.6	0.51	0.62		38.2	52.3	46.5	52.4
16	10	2.7	0	1.59		0.25	0.28	0.37	0.36		0.57	0.74	0.61	0.6		40.6	57.2	32.3	42.8

## Sheet: Sheet5
POM3	眼压	LogMAR	降眼压用药种类	前房深度	悬韧带长度	上	下	鼻	颞	睫状肌厚度	上	下	鼻	颞	小梁网-睫状突夹角	上	下	鼻	颞
1	20	2.6	1	1.7		0.45	0.48	0.48	0.49		0.58	0.77	0.52	0.51		61.4	37.4	48.1	52.8
2	14	2.8	0	1.33		0.56	0.38	0.54	0.43		0.51	0.5	0.62	0.33		85.4	74.1	70.6	71.4
3	14	2	0	1.35		1.03	1	0.91	1.03		0.77	0.68	0.65	0.74		39.8	67	69.5	58.3
4	16	2.9	0	1.67		0.56	0.63	0.69	0.71		0.54	0.51	0.52	0.52		43.3	31.5	30.6	35.3
5	15	1.8	2	1.82		0.72	0.74	0.77	0.84		0.53	0.68	0.65	0.63		74.3	51.3	54.4	44.1
6	13	2.7	0	1.77		0.51	0.55	0.5	0.49		0.66	0.85	0.81	0.7		38.5	64.7	41.2	33.8
7	11	2.8	0	1.7		0.83	0.86	0.89	0.74		0.95	0.92	0.83	0.9		47.5	59.2	43.3	60.1
8	14	2.7	0	1.51		0.69	0.78	0.71	0.66		0.52	0.58	0.63	0.46		63.8	62.2	52.6	58.4
9	16	1.6	0	1.55		0.67	0.68	0.63	0.6		0.61	0.74	0.55	0.63		70.1	52.6	71.4	62.5
10	12	2.7	0	1.62		0.71	0.69	0.73	0.8		0.57	0.64	0.61	0.64		42.1	51.3	52.3	51.3
11	16	1.6	0	1.52		0.66	0.58	0.54	0.62		0.59	0.62	0.59	0.59		41.4	48.5	53.7	50.2
12	17	2	1	1.45		0.57	0.62	0.49	0.51		0.52	0.56	0.61	0.7		39.9	43.4	43.8	38
13	14	2	0	1.7		0.49	0.47	0.54	0.63		0.54	0.64	0.64	0.63		53.6	43.2	41.3	44.1
14	15	1.8	0	1.76		0.66	0.63	0.59	0.74		0.58	0.52	0.61	0.55		53.2	37.7	51.6	49.5
15	14	1.6	0	1.64		0.58	0.55	0.6	0.57		0.61	0.57	0.52	0.6		37	51.4	46.3	52.8
16	15	2.7	0	1.59		0.61	0.63	0.6	0.58		0.51	0.73	0.62	0.56		41.4	56.4	33.1	41.7
